# Supplementary material for: Carbon quantum dots in the electroanalysis of DNA and albumin
Source: Research Square preprint supplement (doi:10.21203/rs.3.rs-6219150/v1), 2025-03-31
Supplement: Supplementary file 1 [file 455e5f38000e3767d882af9e.docx]

Highlights

Nano-carbon quantum dots were prepared by a hydrothermal method

Electrochemistry of nucleic acid or protein complexes with CQDs were studied

CQDs biocomplexes permit visualization of biological objects and electro analysis simultaneously
